# Supplementary material for: Regular Alpha-Fetoprotein Tests Boost Curative Treatment and Survival for Hepatocellular Carcinoma Patients in an Endemic Area
Source: MDPI journal article supplement (doi:10.3390/cancers16010150), 2023-12-28
Supplement: s1 [file s1]

**Supplementary Table S1.** List of KDATCC Codes and ICD-10 Codes

| <b>Name</b>                       | <b>KDATCC codes</b>                                                                                                                 |
|-----------------------------------|-------------------------------------------------------------------------------------------------------------------------------------|
| Lamivudine                        | 180901ATB                                                                                                                           |
| Adeofovir                         | 457501ATB                                                                                                                           |
| Entecavir                         | 487202ATB, 487202ATD, 487203ATB, 487203ATD                                                                                          |
| Tenofovir disoproxil fumarate     | 493901ATB, 664901ATB                                                                                                                |
| Tenofovir alafenamide             | 665301ATB                                                                                                                           |
| Tenofovir disoproxil asparate     | 665101ATB                                                                                                                           |
| Telbivudine                       | 506001ATB                                                                                                                           |
| Clevudine                         | 487801ACH, 487802ACH, 487803ACH                                                                                                     |
| Besifovir                         | 665401ATB                                                                                                                           |
| Ribavirin                         | 223604ACH, 223601ACH, 223601ACH                                                                                                     |
| Interferon                        | L03AB04, L03AB05, L03AB10, L03AB11                                                                                                  |
| <b>Name</b>                       | <b>ICD-10 codes</b>                                                                                                                 |
| HBV                               | Z22.51, B18.0, B18.1, B18.10, B18.18                                                                                                |
| HCV                               | B18.2, Z22.52                                                                                                                       |
| Alcohol                           | K70.0, K70.1, K70.2, K70.3, K70.4, K70.9                                                                                            |
| Non-alcoholic fatty liver disease | K76.0, K76.0A, K75.8B                                                                                                               |
| Others                            |                                                                                                                                     |
| Wilson's disease                  | E83.0                                                                                                                               |
| Autoimmune hepatitis              | K75.4                                                                                                                               |
| Primary biliary cholangitis       | K74.30, K74.31, K74.32, K74.39                                                                                                      |
| Liver cirrhosis                   | K74.0X, K74.1X, K74.2X, K74.3X, K74.4X, K74.5X, K74.6X, K70.2, K70.3, K76.6, I85.XX, I86.4X, K70.43, K71.11, K72.01, K72.11, K72.91 |
